# Supplementary material for: Circular RNA expression profiles during the differentiation of mouse neural stem cells
Source: PubMed Central journal article supplement (PMC6302452; doi:10.1186/s12918-018-0651-1), 2018-12-21
Supplement: 12918_2018_651_MOESM1_ESM.pdf [file 12918_2018_651_MOESM1_ESM.pdf]

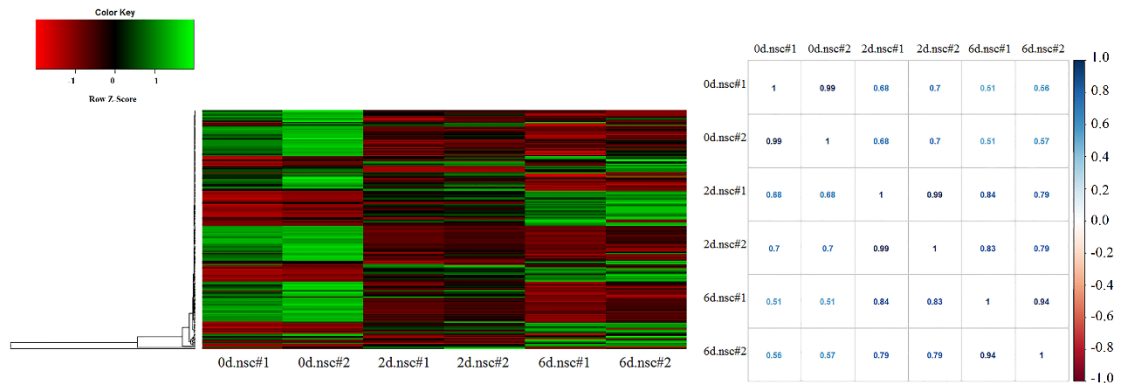

**Figure S1: Heatmap and correlation matrix for top 200 expressed genes in different time course.** (A) Heatmap of expression profiles for top 200 expressed genes in different groups, red through green color indicates the expression level from low to high. (B) The matrix contains the correlation between different groups, Blue color means high correlation and Red color means weak correlation.

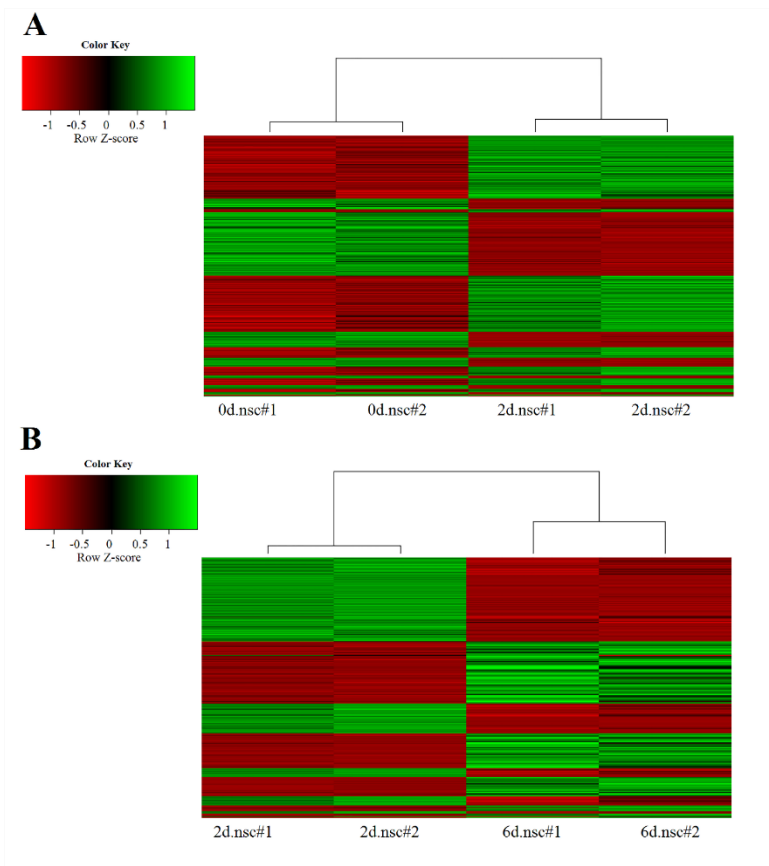

**Figure S2: Profiling of differentially expressed mRNAs during NSC differentiation.** Heatmap of expression profiles for mRNA that were differentially expressed during NSC differentiation. The color bar (red through green) indicates the expression level from low to high. (A) Differentially expressed mRNA in differential expression analysis between groups 2d.nsc and 0d.nsc. (B) Differentially expressed mRNA in differential expression analysis between groups 6d.nsc and 2d.nsc.

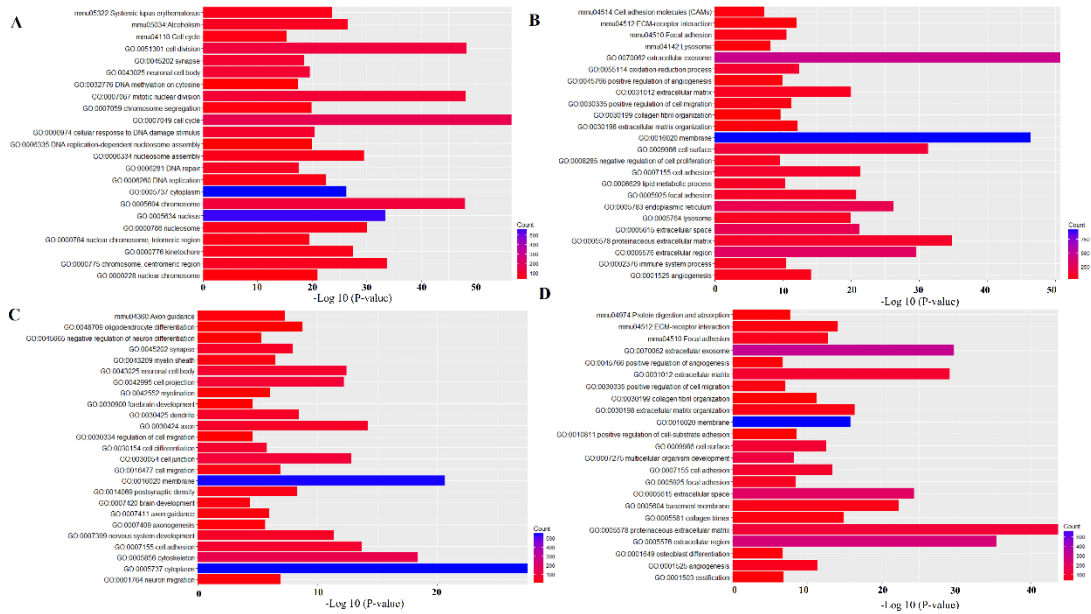

**Figure S3: GO enrichment analysis and KEGG PATHWAY analysis on the differentially expressed genes in differentiation.** The top 10 GO enriched items in Biological Process and Cellular Component and top 3 enriched KEGG PATHWAY item. (A) Down-regulated mRNA in 2d.nsc versus 0d.nsc. (B) Up-regulated mRNA in 2d.nsc versus 0d.nsc. (C) Up-regulated mRNA in 6d.nsc versus 2d.nsc. (D) Down-regulated mRNA in 6d.nsc versus 2d.nsc.

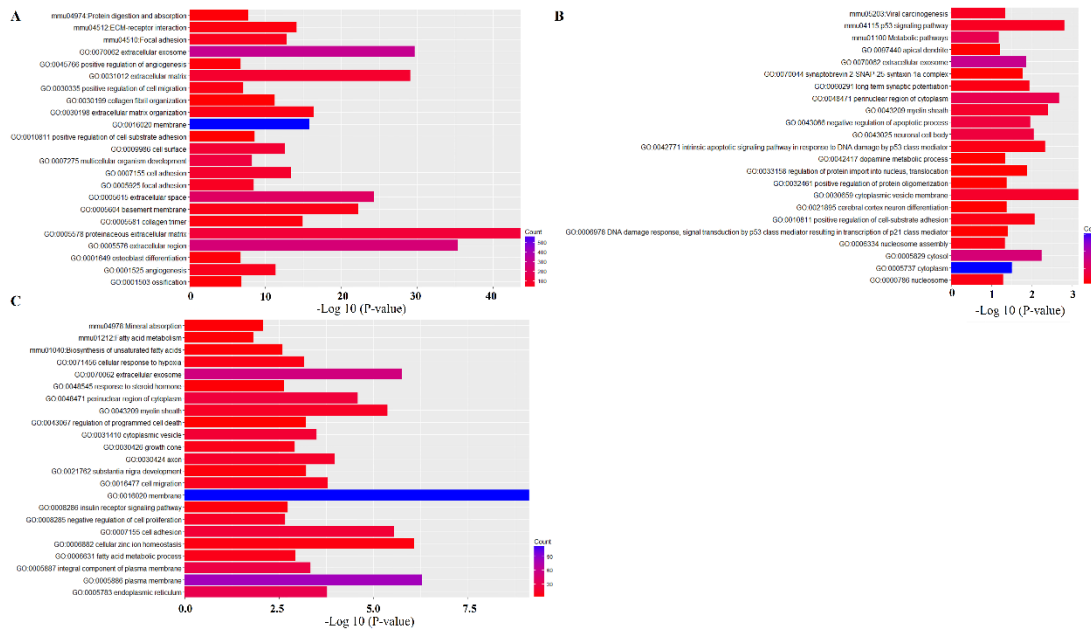

**Figure S4: GO enrichment analysis and KEGG PATHWAY analysis on differentially expressed mRNA in Pattern 1, 2 and 3.** The top 10 GO enriched items in Biological Process and Cellular Component and top 3 enriched KEGG PATHWAY item. (A) Analysis on Pattern 3. (B) Analysis on Pattern 2. (C) Analysis on Pattern 1.

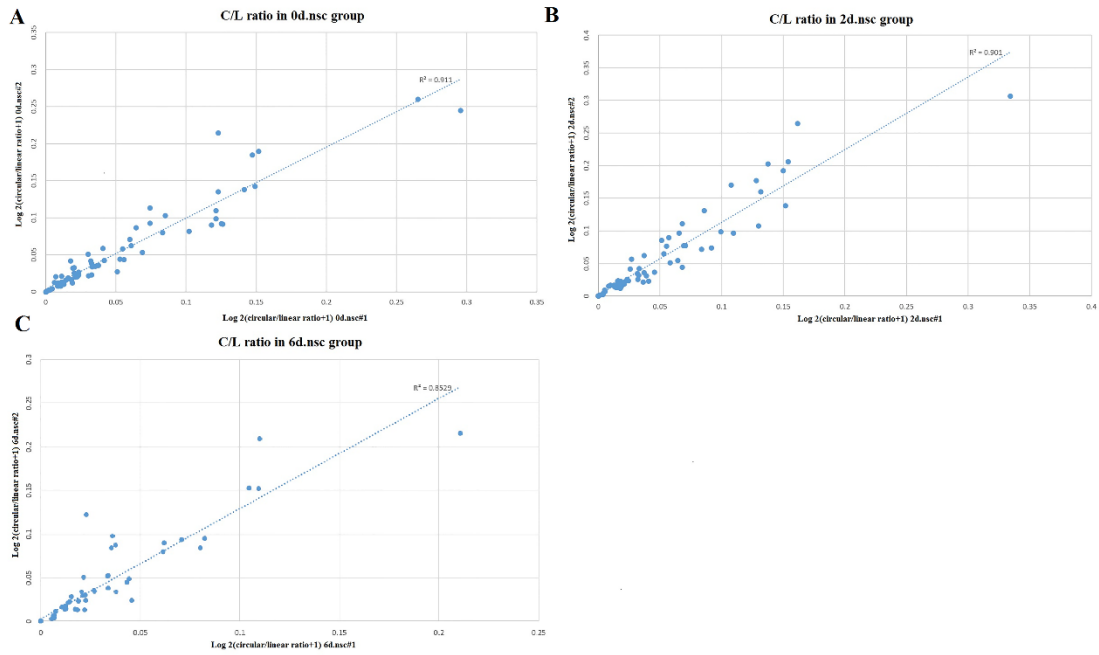

**Figure S5: Circular/linear expression ratio between these circRNA and their parental genes.** Circular/linear expression ratio between these circRNA and their parental genes in different replicates. (A) C/L ratio in 0d.nsc replicates. (B) C/L ratio in 2d.nsc replicates. (C) C/L ratio in 6d.nsc replicates.

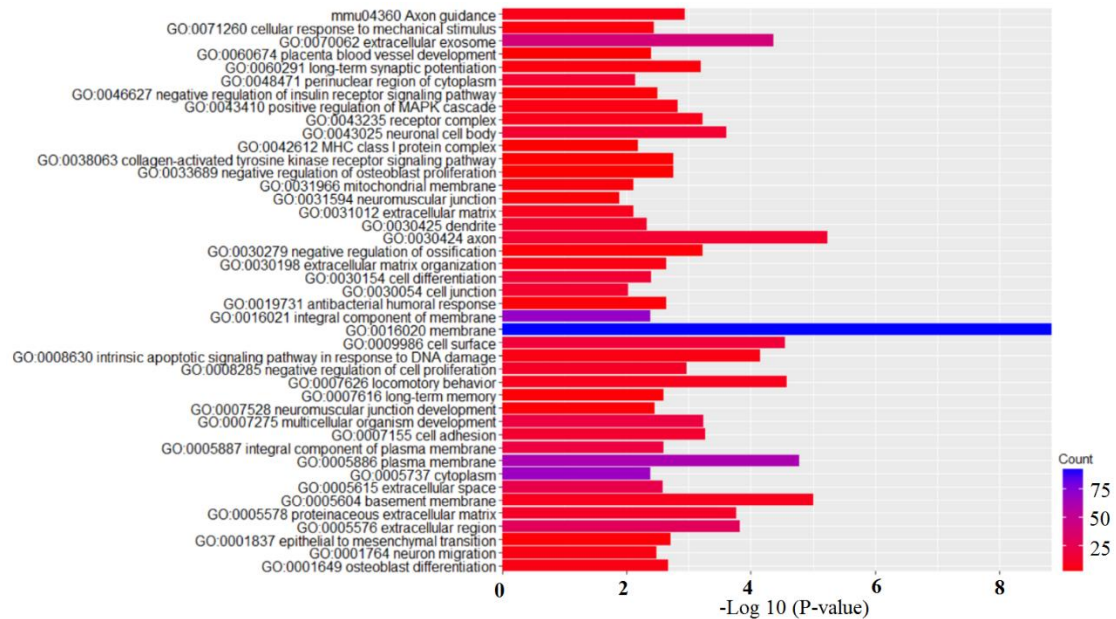

**Figure S6: GO enrichment analysis on mRNA in the co-expression network.** GO enrichment analysis on mRNA in the co-expression network.



|                                                                                 |    |          |
|---------------------------------------------------------------------------------|----|----------|
| GO:0048709 oligodendrocyte differentiation                                      | 4  | 0.001928 |
| GO:0001764 neuron migration                                                     | 6  | 0.002162 |
| GO:0045665 negative regulation of neuron differentiation                        | 5  | 0.002319 |
| GO:0045773 positive regulation of axon extension                                | 4  | 0.003084 |
| GO:0007017 microtubule-based process                                            | 4  | 0.00331  |
| GO:0051310 metaphase plate congression                                          | 3  | 0.003327 |
| GO:0007059 chromosome segregation                                               | 5  | 0.004105 |
| GO:0007051 spindle organization                                                 | 3  | 0.005935 |
| GO:0007064 mitotic sister chromatid cohesion                                    | 3  | 0.006695 |
| GO:0006915 apoptotic process                                                    | 11 | 0.009023 |
| GO:0007088 regulation of mitotic nuclear division                               | 3  | 0.00922  |
| GO:0000070 mitotic sister chromatid segregation                                 | 3  | 0.012104 |
| GO:0090316 positive regulation of intracellular protein transport               | 3  | 0.013142 |
| GO:0001578 microtubule bundle formation                                         | 3  | 0.016477 |
| GO:2000463 positive regulation of excitatory postsynaptic potential             | 3  | 0.01766  |
| GO:0007275 multicellular organism development                                   | 15 | 0.01814  |
| GO:0019233 sensory perception of pain                                           | 4  | 0.018791 |
| GO:0007165 signal transduction                                                  | 17 | 0.0206   |
| GO:0030951 establishment or maintenance of microtubule cytoskeleton polarity    | 2  | 0.021742 |
| GO:0032387 negative regulation of intracellular transport                       | 2  | 0.021742 |
| GO:0048663 neuron fate commitment                                               | 3  | 0.022739 |
| GO:0000086 G2/M transition of mitotic cell cycle                                | 3  | 0.024092 |
| GO:0014051 gamma-aminobutyric acid secretion                                    | 2  | 0.028884 |
| GO:0000226 microtubule cytoskeleton organization                                | 4  | 0.03324  |
| GO:0030010 establishment of cell polarity                                       | 3  | 0.034436 |
| GO:0045143 homologous chromosome segregation                                    | 2  | 0.035975 |
| GO:0000122 negative regulation of transcription from RNA polymerase II promoter | 11 | 0.041004 |
| GO:0006887 exocytosis                                                           | 4  | 0.041622 |
| GO:0047497 mitochondrion transport along microtubule                            | 2  | 0.043015 |
| GO:0030819 positive regulation of cAMP biosynthetic process                     | 3  | 0.049773 |

| Cellular Component Term                   | Count | P-value  |
|-------------------------------------------|-------|----------|
| GO:0005737 cytoplasm                      | 81    | 1.05E-08 |
| GO:0005856 cytoskeleton                   | 27    | 7.35E-08 |
| GO:0005874 microtubule                    | 14    | 6.34E-07 |
| GO:0005694 chromosome                     | 12    | 3.64E-05 |
| GO:0030425 dendrite                       | 14    | 4.93E-05 |
| GO:0030424 axon                           | 12    | 7.02E-05 |
| GO:0000922 spindle pole                   | 7     | 1.11E-04 |
| GO:0005634 nucleus                        | 65    | 1.16E-04 |
| GO:0043025 neuronal cell body             | 13    | 4.45E-04 |
| GO:0005871 kinesin complex                | 5     | 5.11E-04 |
| GO:0000775 chromosome, centromeric region | 7     | 5.22E-04 |
| GO:0015630 microtubule cytoskeleton       | 7     | 9.47E-04 |
| GO:0045202 synapse                        | 12    | 9.94E-04 |

|                                                           |    |          |
|-----------------------------------------------------------|----|----------|
| GO:0000776 kinetochore                                    | 6  | 0.001686 |
| GO:0030054 cell junction                                  | 14 | 0.001878 |
| GO:1990023 mitotic spindle midzone                        | 3  | 0.002654 |
| GO:0097431 mitotic spindle pole                           | 3  | 0.00373  |
| GO:0048471 perinuclear region of cytoplasm                | 13 | 0.00396  |
| GO:0042995 cell projection                                | 13 | 0.004956 |
| GO:0005815 microtubule organizing center                  | 6  | 0.005076 |
| GO:0005635 nuclear envelope                               | 6  | 0.005491 |
| GO:0014069 postsynaptic density                           | 7  | 0.007362 |
| GO:0019013 viral nucleocapsid                             | 3  | 0.010592 |
| GO:0043209 myelin sheath                                  | 6  | 0.01218  |
| GO:0000785 chromatin                                      | 5  | 0.012627 |
| GO:0016020 membrane                                       | 64 | 0.013296 |
| GO:0043234 protein complex                                | 11 | 0.014491 |
| GO:0005794 Golgi apparatus                                | 16 | 0.022443 |
| GO:0005795 Golgi stack                                    | 3  | 0.024336 |
| GO:0030426 growth cone                                    | 5  | 0.02706  |
| GO:0000942 condensed nuclear chromosome outer kinetochore | 2  | 0.028181 |
| GO:0031262 Ndc80 complex                                  | 2  | 0.028181 |
| GO:0045298 tubulin complex                                | 2  | 0.028181 |
| GO:0043005 neuron projection                              | 8  | 0.030901 |
| GO:0016363 nuclear matrix                                 | 4  | 0.032072 |
| GO:0005813 centrosome                                     | 8  | 0.036308 |
| GO:0034991 nuclear meiotic cohesin complex                | 2  | 0.041974 |
| GO:0008278 cohesin complex                                | 2  | 0.041974 |
| GO:0072686 mitotic spindle                                | 3  | 0.044177 |

**Table S4: Number of circRNA expressed in differentiation.**

|        | 0d.nsc#1 | 0d.nsc#2 | 2d.nsc#1 | 2d.nsc#2 | 6d.nsc#1 | 6d.nsc#2 |
|--------|----------|----------|----------|----------|----------|----------|
| Number | 4649     | 4918     | 4593     | 4709     | 3158     | 3545     |
